# Supplementary material for: Accuracy of International Classification of Diseases, 10th Revision Codes for Identifying Sepsis: A Systematic Review and Meta-Analysis
Source: PubMed Central journal article supplement — Crit Care Explor. 2022 Nov 9;4(11):e0788. doi: 10.1097/CCE.0000000000000788 (PMC9649267; doi:10.1097/cce.0000000000000788), 2022-11-09
Supplement: cc9-4-e0788-s001.pdf [file cc9-4-e0788-s001.pdf]

Supplementary for “Accuracy of International Classification of Diseases 10th Revision Codes for Identifying Sepsis: A Systematic Review and Meta-analysis”

|                                                                                                                                                                                              |    |
|----------------------------------------------------------------------------------------------------------------------------------------------------------------------------------------------|----|
| <b>Supplementary for “Accuracy of International Classification of Diseases 10th Revision Codes for Identifying Sepsis: A Systematic Review and Meta-analysis”</b>                            | 1  |
| Supplementary Table 1. PRISMA-DTA Checklist                                                                                                                                                  | 2  |
| Supplementary Table 2: Summary of sepsis study characteristics and findings                                                                                                                  | 5  |
| Supplementary Table 3. Study designs of included articles                                                                                                                                    | 8  |
| Supplementary Table 4. Non-pooled unweighted PPV, NPV, Sn and Sp from 13 sepsis studies on the accuracy of sepsis ICD-10 codes                                                               | 15 |
| Supplementary Table 5. GRADE: Certainty of evidence for the accuracy of sepsis ICD-10 codes                                                                                                  | 16 |
| Supplementary Table 6. Comparison of sepsis ICD-10 code accuracy when manual chart is exclusively used versus when it is not exclusively used versus when it is used along registry database | 18 |
| Supplementary Table 7. Comparison of sepsis ICD-10 code accuracy when codes are explicitly given versus not reported/explicit                                                                | 19 |
| Supplementary Table 8. Quartile classification of sepsis ICD-10 codes based on accuracy                                                                                                      | 20 |
| Supplementary Appendix 1. MESH Terms and Search Strategies                                                                                                                                   | 23 |
| Supplementary Appendix 2. Additional sensitivity and specificity forest plots                                                                                                                | 25 |
| Supplementary Figure 1. QUADAS of 15 sepsis studies on the accuracy of ICD-10 codes                                                                                                          | 29 |

**Supplementary Table 1. PRISMA-DTA Checklist**

| Section/Topic               | #  | PRISMA-DTA Checklist Item                                                                                                                                                                                                                                                | Reported on page #         |
|-----------------------------|----|--------------------------------------------------------------------------------------------------------------------------------------------------------------------------------------------------------------------------------------------------------------------------|----------------------------|
| Title/Abstract              |    |                                                                                                                                                                                                                                                                          |                            |
| Title                       | 1  | Identify the report as a systematic review (+/- meta-analysis) of diagnostic test accuracy (DTA) studies.                                                                                                                                                                | 1                          |
| Abstract                    | 2  | Abstract: See PRISMA-DTA for abstracts                                                                                                                                                                                                                                   | 2                          |
| Introduction                |    |                                                                                                                                                                                                                                                                          |                            |
| Rationale                   | 3  | Describe the rationale for the review in the context of what is already known.                                                                                                                                                                                           | 4                          |
| Clinical role of index test | D1 | State the scientific and clinical background, including the intended use and clinical role of the index test, and if applicable, the rationale for minimally acceptable test accuracy (or minimum difference in accuracy for comparative design).                        | 4                          |
| Objectives                  | 4  | Provide an explicit statement of question(s) being addressed in terms of participants, index test(s), and target condition(s).                                                                                                                                           | 5                          |
| Methods                     |    |                                                                                                                                                                                                                                                                          |                            |
| Protocol and registration   | 5  | Indicate if a review protocol exists, if and where it can be accessed (e.g., Web address), and, if available, provide registration information including registration number.                                                                                            | 5                          |
| Eligibility criteria        | 6  | Specify study characteristics (participants, setting, index test(s), reference standard(s), target condition(s), and study design) and report characteristics (e.g., years considered, language, publication status) used as criteria for eligibility, giving rationale. | 5-6                        |
| Information sources         | 7  | Describe all information sources (e.g., databases with dates of coverage, contact with study authors to identify additional studies) in the search and date last searched.                                                                                               | 5                          |
| Search                      | 8  | Present full search strategies for all electronic databases and other sources searched, including any limits used, such that they could be repeated.                                                                                                                     | Supplementary - Appendix 1 |

|                                 |    |                                                                                                                                                                                                                                                                                                                                                                                                                                           |                            |
|---------------------------------|----|-------------------------------------------------------------------------------------------------------------------------------------------------------------------------------------------------------------------------------------------------------------------------------------------------------------------------------------------------------------------------------------------------------------------------------------------|----------------------------|
| Study selection                 | 9  | State the process for selecting studies (i.e., screening, eligibility, included in systematic review, and, if applicable, included in the meta-analysis).                                                                                                                                                                                                                                                                                 | 6                          |
| Data collection process         | 10 | Describe method of data extraction from reports (e.g., piloted forms, independently, in duplicate) and any processes for obtaining and confirming data from investigators.                                                                                                                                                                                                                                                                | 7                          |
| Definitions for data extraction | 11 | Provide definitions used in data extraction and classifications of target condition(s), index test(s), reference standard(s) and other characteristics (e.g. study design, clinical setting).                                                                                                                                                                                                                                             | 7                          |
| Risk of bias and applicability  | 12 | Describe methods used for assessing risk of bias in individual studies and concerns regarding the applicability to the review question.                                                                                                                                                                                                                                                                                                   | 7                          |
| Diagnostic accuracy measures    | 13 | State the principal diagnostic accuracy measure(s) reported (e.g. sensitivity, specificity) and state the unit of assessment (e.g. per-patient, per-lesion).                                                                                                                                                                                                                                                                              | 7                          |
| Synthesis of results            | 14 | Describe methods of handling data, combining results of studies and describing variability between studies. This could include, but is not limited to: a) handling of multiple definitions of target condition. b) handling of multiple thresholds of test positivity, c) handling multiple index test readers, d) handling of indeterminate test results, e) grouping and comparing tests, f) handling of different reference standards. | 7-8                        |
| Meta-analysis                   | D2 | Report the statistical methods used for meta-analyses, if performed.                                                                                                                                                                                                                                                                                                                                                                      | 8                          |
| Additional analyses             | 16 | Describe methods of additional analyses (e.g., sensitivity or subgroup analyses, meta-regression), if done, indicating which were pre-specified.                                                                                                                                                                                                                                                                                          | 8                          |
| Results                         |    |                                                                                                                                                                                                                                                                                                                                                                                                                                           |                            |
| Study selection                 | 17 | Provide numbers of studies screened, assessed for eligibility, included in the review (and included in meta-analysis, if applicable) with reasons for exclusions at each stage, ideally with a flow diagram.                                                                                                                                                                                                                              | 9                          |
| Study characteristics           | 18 | For each included study provide citations and present key characteristics including: a) participant characteristics (presentation, prior testing), b) clinical setting, c) study design, d) target condition definition, e) index test, f) reference standard, g) sample size, h) funding sources                                                                                                                                         | Supplementary Table 3      |
| Risk of bias and applicability  | 19 | Present evaluation of risk of bias and concerns regarding applicability for each study.                                                                                                                                                                                                                                                                                                                                                   | 10, Supplementary Figure 1 |
| Results of individual studies   | 20 | For each analysis in each study (e.g. unique combination of index test, reference standard, and positivity threshold) report 2x2 data (TP, FP, FN, TN) with estimates of diagnostic accuracy and confidence intervals, ideally with a forest or receiver operator characteristic (ROC) plot.                                                                                                                                              | Supplementary Table 2      |

|                      |    |                                                                                                                                                                                                              |    |
|----------------------|----|--------------------------------------------------------------------------------------------------------------------------------------------------------------------------------------------------------------|----|
| Synthesis of results | 21 | Describe test accuracy, including variability; if meta-analysis was done, include results and confidence intervals.                                                                                          | 11 |
| Additional analyses  | 22 | Give results of additional analyses, if done (e.g., sensitivity or subgroup analyses, meta-regression; analysis of index test: failure rates, proportion of inconclusive results, adverse events).           | 12 |
| Discussion           |    |                                                                                                                                                                                                              |    |
| Summary of evidence  | 24 | Summarize the main findings including the strength of evidence                                                                                                                                               | 13 |
| Limitations          | 25 | Discuss limitations from included studies (e.g. risk of bias and concerns regarding applicability) and from the review process (e.g. incomplete retrieval of identified research).                           | 17 |
| Conclusions          | 26 | Provide a general interpretation of the results in the context of other evidence. Discuss implications for future research and clinical practice (e.g. the intended use and clinical role of the index test) | 18 |
| Funding              |    |                                                                                                                                                                                                              |    |
| Funding              | 27 | For the systematic review, describe the sources of funding and other support and the role of the funders                                                                                                     | 1  |

Adapted From: McInnes MDF, Moher D, Thombs BD, McGrath TA, Bossuyt PM, The PRISMA-DTA Group (2018). Preferred Reporting Items for a Systematic Review and Meta-analysis of Diagnostic Test Accuracy Studies: The PRISMA-DTA Statement. JAMA. 2018 Jan 23;319(4):388-396. doi: 10.1001/jama.2017.19163.

**Supplementary Table 2: Summary of sepsis study characteristics and findings**

| Author, Year            | Country, Center (single, multi) | Study Population and Time Period | Subgroup Name                                                                                                            | Sample size (n) | PPV <sup>a</sup> (%) | NPV <sup>b</sup> (%) | Sn <sup>c</sup> (%) | Sp <sup>d</sup> (%) |
|-------------------------|---------------------------------|----------------------------------|--------------------------------------------------------------------------------------------------------------------------|-----------------|----------------------|----------------------|---------------------|---------------------|
| Søgaard, 2015 (28)      | Denmark Single                  | Adult inpatients 1994-2012       | Septicemia/sepsis due to other Gram-negative organisms: A41.5 (Primary + Secondary Diagnosis) <sup>e</sup>               | 56              | 86                   | --                   | --                  | --                  |
|                         |                                 |                                  | Urosepsis (Primary + Secondary diagnosis) <sup>f</sup>                                                                   | 44              | 55                   | --                   | --                  | --                  |
|                         |                                 |                                  | Combined Urosepsis + Septicemia/sepsis due to other Gram-negative organisms (Primary + Secondary Diagnosis) <sup>g</sup> | 100             | 72                   | --                   | --                  | --                  |
| Lauridsen, 2015 (29)    | Denmark Single                  | Adult inpatients 2005-2012       | Diagnosis code + inotropic/vasopressor code                                                                              | 34              | 82.4                 | --                   | --                  | --                  |
|                         |                                 |                                  | Sepsis                                                                                                                   | 78              | 69.2                 | --                   | --                  | --                  |
| Madsen, 1998 (30)       | Denmark Single                  | Not reported 1994-1994           | Sepsis + Septicemia                                                                                                      | 406             | --                   | --                   | 5.9                 | --                  |
|                         |                                 |                                  | Septicemia                                                                                                               | 406             | 21.7                 | --                   | 4.4                 | --                  |
| Holland-Bill, 2014 (31) | Denmark Single                  | Adults inpatients 2006-2010      | Sepsis confirmed by evidence-based criteria                                                                              | 45              | 68.9                 | --                   | --                  | --                  |
|                         |                                 |                                  | Sepsis confirmed by physician global assessment                                                                          | 45              | 84.4                 | --                   | --                  | --                  |
|                         | Australia Single                | Adult inpatient (emergency, ICU) | Diagnosis-based code categories in emergency department information system (D-BC-EDIS)                                   | 23              | 78.3                 | 85.5                 | 7.1                 | 99.6                |

<sup>a</sup> PPV: Positive Predictive Value

<sup>b</sup> NPV: Negative Predictive Value

<sup>c</sup> Sn: Sensitivity

<sup>d</sup> Sp: Specificity

<sup>e</sup> Primary diagnosis (PPV %, True Positive (TP), n for analysis): 80, 28, 56

Secondary Diagnosis (PPV %, TP, n for analysis): 95, 20, 56

<sup>f</sup> Primary Diagnosis (PPV %, TP, n for analysis): 55, 21, 39

Secondary Diagnosis (PPV %, TP, n for analysis): 60, 3, 5

<sup>g</sup> Primary diagnosis for combined urosepsis + Septicemia/sepsis (PPV %): 67

Secondary diagnosis for combined urosepsis + Septicemia/sepsis (PPV %): 88

|                                   |                        |                                                |                                                                                                                 |     |      |      |      |      |
|-----------------------------------|------------------------|------------------------------------------------|-----------------------------------------------------------------------------------------------------------------|-----|------|------|------|------|
| Ibrahim, 2012<br>(32)             |                        | 2000-2006                                      | Diagnosis-based code categories in hospital mortality data system (D-BC-HMDS)                                   | 45  | 93.9 | 86.8 | 16.5 | 99.8 |
| Das, 2016<br>(33)                 | Australia<br>Single    | Adult hospital encounters/admissions 2002-2011 | A41.0 coded episodes including the SAB episodes identified at other institutions (LIS-/ICD10+/SAB+)             | 565 | 81   | --   | --   | --   |
|                                   |                        |                                                | ICD-10 (A41.0) excluding emergency Department presentation                                                      | 729 | --   | --   | 56   | --   |
|                                   |                        |                                                | ICD-10 (A41.0) code                                                                                             | 740 | 72   | --   | 55   | --   |
| Reilly, 2020<br>(34)              | Australia<br>Single    | Pediatric and adult in-patients 2017-2018      | Septic shock and systemic inflammatory response syndrome                                                        | 475 | 30   | 97.8 | 47.4 | 95.4 |
| Fleischmann-Struzek, 2018<br>(35) | Germany<br>Single      | Adult inpatients 2007-2013                     | ICD abstraction for sepsis (incl. severe sepsis) - R Codes (R65.0, R65.1, R57.2) <sup>h</sup>                   | 151 | 77.2 | 95.8 | 22.1 | 99.6 |
|                                   |                        |                                                | ICD abstraction for severe sepsis (incl. septic shock) -R Codes (R65.1, R57.2)                                  | 151 | 56.1 | 98.5 | 25.1 | 99.6 |
|                                   |                        |                                                | ICD abstraction for severe sepsis (incl. septic shock) - explicit sepsis coding <sup>i</sup> +organ dysfunction | 151 | 59.6 | 98.8 | 41.9 | 99.4 |
|                                   |                        |                                                | ICD abstraction for sepsis (incl. severe sepsis) - explicit coding                                              | 151 | 78.5 | 95.9 | 25.7 | 99.6 |
|                                   |                        |                                                | ICD abstraction for severe sepsis (incl. septic shock) - implicit sepsis coding <sup>j</sup>                    | 151 | 22.1 | 99.1 | 59.0 | 95.7 |
| Quan, 2013<br>(36)                | Canada<br>Multiple (3) | Adult post-operative patients 2007-2008        | Postoperative sepsis among surgery patients present on admission                                                | 41  | 9.8  | --   | --   | --   |
|                                   |                        |                                                | Postoperative sepsis present on admission excluding surgical status                                             | 117 | 27.4 | --   | --   | --   |
|                                   |                        |                                                | Postoperative sepsis among surgery patients excluding on admission                                              | 16  | 12.5 | --   | --   | --   |

<sup>h</sup> R codes refer to clinical sepsis codes related to general signs and symptoms

<sup>i</sup> Explicit sepsis coding abstracts sepsis cases based on all sepsis codes

<sup>j</sup> Implicit sepsis coding abstracts sepsis cases based on infectious disease and organ dysfunction codes so as to mirror the clinical sepsis criteria

|                          |                                                              |                                                                                 |                                                                       |      |      |       |      |       |
|--------------------------|--------------------------------------------------------------|---------------------------------------------------------------------------------|-----------------------------------------------------------------------|------|------|-------|------|-------|
|                          |                                                              |                                                                                 | Postoperative sepsis excluding on admission excluding surgical status | 34   | 47.1 | --    | --   | --    |
| Jolley, 2015 (37)        | Canada Multiple (3)                                          | Adult inpatients (ICU and non-ICU) 2009-2012                                    | Canadian Institute for Health Information (CIHI) ICU - Sepsis         | 1001 | 98.2 | 54.7  | 46.4 | 98.7  |
|                          |                                                              |                                                                                 | CIHI ICU - Severe Sepsis                                              | 1001 | 95.3 | 63.2  | 47.2 | 97.5  |
|                          |                                                              |                                                                                 | CIHI Non-ICU - Sepsis                                                 | 202  | 100  | 93.0  | 6.7  | 100   |
|                          |                                                              |                                                                                 | CIHI Non-ICU - Severe Sepsis                                          | 202  | 100  | 98.5  | 25   | 100   |
|                          |                                                              |                                                                                 | Optimized coding algorithm ICU - Sepsis                               | 1001 | 88.2 | 66.6  | 71.9 | 85.4  |
|                          |                                                              |                                                                                 | Optimized coding algorithm ICU - Severe Sepsis                        | 1001 | 85.6 | 70.1  | 65.1 | 88.2  |
|                          |                                                              |                                                                                 | Optimized Non-ICU - Sepsis                                            | 202  | 52.6 | 96.7  | 60   | 94.7  |
|                          |                                                              |                                                                                 | Optimized Non-ICU - Severe Sepsis                                     | 202  | 50   | 98.5  | 25   | 99.5  |
| Parthasarathy, 2015 (38) | England (HES database) , USA (ACS NSQIP database)<br>Unknown | Adult inpatient, outpatient, accident, emergency and surgery patients 2013-2014 | Septic shock (T811 and R572)                                          | 1323 | 50   | 96.67 | 2.22 | 99.92 |
| Agyeman, 2019 (39)       | Switzerland Multiple (10)                                    | Pediatric patients with blood culture-proven sepsis, 2011-2015                  | Sepsis                                                                | 679  | --   | --    | 67   | --    |
| Dunatchik, 2017 (40)     | USA Single                                                   | Adult inpatient patients and hospital encounters/admissions 2016-2016           | Sepsis                                                                | 626  | 82.9 | 94.2  | 66.3 | 97.6  |

**Supplementary Table 3. Study designs of included articles**

| Author, Year              | Method of Patient/ Admission selection              | No. Enrolled | Reference Standard                                         | Validation Procedure                                                                                                                                                                                                                                                                                                                                                                                                                                                                                                          | Case Definition                                                                                                                                | Explicit ICD-10 codes                                                                                                                                                                                                                                                                                                                                                                                                                                                                                                                                                                                                                                |
|---------------------------|-----------------------------------------------------|--------------|------------------------------------------------------------|-------------------------------------------------------------------------------------------------------------------------------------------------------------------------------------------------------------------------------------------------------------------------------------------------------------------------------------------------------------------------------------------------------------------------------------------------------------------------------------------------------------------------------|------------------------------------------------------------------------------------------------------------------------------------------------|------------------------------------------------------------------------------------------------------------------------------------------------------------------------------------------------------------------------------------------------------------------------------------------------------------------------------------------------------------------------------------------------------------------------------------------------------------------------------------------------------------------------------------------------------------------------------------------------------------------------------------------------------|
| Ibrahim, 2012 (32)        | Chart review of patients with ICD codes of interest | 1645         | Royal Perth Hospital Intensive Care Unit Clinical Database | Emergency Department Information System of Perth and the Hospital Morbidity Data system was linked to the Royal Perth Hospital ICU clinical database to validate ICD-10 Australian Modification codes                                                                                                                                                                                                                                                                                                                         | ICU diagnosis of "severe sepsis" (described by ICD-9-C codes and an Acute Physiology and Chronic Health Evaluation score) and defined criteria | A40.0, A40.1, A40.2, A40.3, A40.8, A40.9, A41.0, A41.1, A41.2, A41.3, A41.4, A41.5, A41.51, A41.52, A41.58, A41.8, A41.9                                                                                                                                                                                                                                                                                                                                                                                                                                                                                                                             |
| Fleischmann-Struzek, 2018 | Chart review of randomized patient cohort           | 937          | Manual Chart Review                                        | Charts were reviewed for the presence of infection and sepsis independently by two blinded investigators. Patients were selected from claims data through five coding strategies translated into ICD-10-German Modification (GM):<br>- for sepsis: I) R-codes, II) explicit approach (all sepsis codes = microbiological sepsis codes and R-codes)<br>- for severe sepsis: III) R-codes, (IV) explicit and organ dysfunction codes and V) implicit approach (presence of infection and organ dysfunction codes, Angus method. | Modified ACCP/SCCM consensus criteria ("sepsis-1") based on all available patient data                                                         | R65.0!, R65.1!, R57.2, A02.1, A20.0, A20.7, A21.7, A22.7, A24.1, A26.7, A28.2, A32.7, A39.2, A39.3, A39.4, A39.1, A40, A41, A42.7, A48.3, B00.7, A54.8, B37.7, B37.6, B49, A49.9, R65.0, R65.1, R57.2, I95.9, R57.8, R57.9, J96, J96.9, J80, J98.4, R06.0, R06.8, F05, G93.1, G93.4, R40, N17, N19, E87.2, D65, D68.8, D68.9, D69.5, D69.6, K72.0, K76.2, K72.7, K76.3, R65.1, R57.2, A00, A01, A02, A03, A04, A05, A06, A07, A08, A09, A20, A21, A22, A23, A24, A25, A26, A28, A32, A36, A37, A38, A46, A39, A40, A41, A42, A43, A44, A48, A49, A54, A27, A69.0, A69.1, A69.8, A69.9, A69.2, B35, B36, B37, B38, B39, B40, B49, B41, B42, B43, B44, |



|  |  |  |  |  |                                                                                                                                                                                                                                                                                                                                                                                                                                                                                                                                                                                                                                                                                                                                                                                                                                      |
|--|--|--|--|--|--------------------------------------------------------------------------------------------------------------------------------------------------------------------------------------------------------------------------------------------------------------------------------------------------------------------------------------------------------------------------------------------------------------------------------------------------------------------------------------------------------------------------------------------------------------------------------------------------------------------------------------------------------------------------------------------------------------------------------------------------------------------------------------------------------------------------------------|
|  |  |  |  |  | B45, B46, B47, B48, G00, G01, G02, G03, G04, G05, G06, G07, G08, I30, I32, I33, I39, I40, I41, I80, J00, J01, J02, J03, J04, J06, J05, J09, J10, J11, J12, J13, J14, J15, J16, J17, J18, J20, J21, J22, J44.0, J44.1, J47, J86, J85, K35, K37, K36, K57.12, K57.02, K57.13, K57.03, K57.22, K57.32, K57.23, K57.33, K57.42, K57.43, K57.52, K57.53, K57.82, K57.83, K57.92, K57.93, K61, K65, K67, K63.0, K63.1, K75.0, K75.1, K81.0, N10, N11, N12, N15.1, N15.9, N16, N28.8, N34, N30, N39.0, N41, N45, N51, N48.2, N49, N70, N71, N72, N73, N74, N75, N76, N77, N61, L03, L04, L08, L88, L05, M00, M01, M86, A49.9, T82.6, T82.7, T83.5, T83.6, T84.5, T84.6, T84.7, T85.7, T81.4, T80.2, T88.0, R65.0, R65.1, R57.2, O75.3, O85, O03, O04, O05, O06, O07, O08.0, A15, A16, A17, A18, A19, B00, B50, B51, B52, B53, B54, A90, A91 |
|--|--|--|--|--|--------------------------------------------------------------------------------------------------------------------------------------------------------------------------------------------------------------------------------------------------------------------------------------------------------------------------------------------------------------------------------------------------------------------------------------------------------------------------------------------------------------------------------------------------------------------------------------------------------------------------------------------------------------------------------------------------------------------------------------------------------------------------------------------------------------------------------------|

|                    |                                                     |     |                     |                                                                                                                                                                                                                                                                                               |                                                                                                                                                  |                                                                                                                                                                                                                                                                                                                                                                                                                                                                                                                                                                                      |
|--------------------|-----------------------------------------------------|-----|---------------------|-----------------------------------------------------------------------------------------------------------------------------------------------------------------------------------------------------------------------------------------------------------------------------------------------|--------------------------------------------------------------------------------------------------------------------------------------------------|--------------------------------------------------------------------------------------------------------------------------------------------------------------------------------------------------------------------------------------------------------------------------------------------------------------------------------------------------------------------------------------------------------------------------------------------------------------------------------------------------------------------------------------------------------------------------------------|
| Jolley, 2015       | Chart review of randomized patient cohort           | 604 | Manual Chart Review | Four abstrators performed medical chart review on ICU patients in an ICU-specific clinical database and an inpatient discharge abstract database to validate the Canadian Institute for Health Information (CIHI) ICD-10-CA (Canadian Revision)-coded definition for sepsis and severe sepsis | A checklist criteria tool based on the ACCP/SCCM 2001 Consensus criteria and consensus of clinical experts.                                      | A039, A021, A207, A217, A227, A239, A241, A267, A280, A282, A327, A392, A393, A394, A40, A400, A401, A402, A403, A408, A409, A41, A410, A411, A412, A413, A415, A4150*, A4151*, A4152*, A4158*, A418, A4180*, A4188*, A419, A427, B007, B377, P360, P361, P362, P363, P364, P365, P368, P369, P352, P372, P375 A047, B9548, B956, J189, J440, N390, R57.2, J96.0, J96.9, J80, R09.2, R57.0, R57.1, R57.2, R57.8, R57.9, I95.1, I95.9, N17.0, N17.1, N17.2, N17.8, N17.9, K72.0, K72.9, K76.3, F05.0, F05.9, G93.1, G93.4, G93.80, D69.5, D69.6, D65, 1GZ31CAND, 1GZ31CRND, 1GZ31GPND |
| Holland-Bill, 2014 | Chart review of patients with ICD codes of interest | 266 | Manual Chart Review | A blinded physician used medical chart review to confirm presence and type of infection                                                                                                                                                                                                       | Both a physician global assessment (PGA) and an evidence-based criteria, which was based on the ACCP definition, were used as reference standard | A408, A409, A410, A412, A415, A418, A419, B377                                                                                                                                                                                                                                                                                                                                                                                                                                                                                                                                       |

|                 |                                                     |     |                                                                     |                                                                                                                                                                                                                                                                                                                                                      |                                                                                                                                                                                                  |                                                                                                                                                                                                                                       |
|-----------------|-----------------------------------------------------|-----|---------------------------------------------------------------------|------------------------------------------------------------------------------------------------------------------------------------------------------------------------------------------------------------------------------------------------------------------------------------------------------------------------------------------------------|--------------------------------------------------------------------------------------------------------------------------------------------------------------------------------------------------|---------------------------------------------------------------------------------------------------------------------------------------------------------------------------------------------------------------------------------------|
| Das, 2016       | Chart review of patients with ICD codes of interest | 897 | Registry Database - Canberra Hospital laboratory information system | Investigators retrospectively compared ICD-10 code A41.0 (S. aureus sepsis) to S. aureus bacteremia identified from the Canberra Hospital laboratory information system (LIS). Patients with LIS identified SAB (LIS+) and/or the ICD-10 code A41.0 were identified and classified as concordant (LIS+/ICD+) or discordant (LIS+/ICD- or LIS-/ICD+). | Isolation of S. aureus from blood culture                                                                                                                                                        | A41.0                                                                                                                                                                                                                                 |
| Dunatchik, 2017 | Chart review of randomized patient cohort           | 626 | Manual Chart Review                                                 | Two physicians completed independent chart reviews                                                                                                                                                                                                                                                                                                   | 2016 'Sepsis 3' definition created by the ESICM-SCCM Sepsis Redefinitions Task Force                                                                                                             | N/A                                                                                                                                                                                                                                   |
| Madsen, 1998    | Chart review of patients with ICD codes of interest | 377 | Manual Chart Review and Registry Database - Bacteremia database     | Patients identified from hospital discharge registry were compared to the hospital's bacteremia database<br><br>A random subset of episodes registered only in bacteremia database were selected for hospital record review and for review of main discharge diagnoses                                                                               | Sepsis was defined as clinical evidence of infection and evidence of systemic response to infection<br><br>Septicemia was defined according to criteria from Young 1995, and included bacteremia | Septicemia: A42.7, A41.3, A54.8, A02.1, A40.0, A40.2, A41.9, A40.8, A41.1, A41.2, A40.9, A41.4, A41.5, A41.0, A40.1, A40.3, A28.2, A41.8<br>P36, P36.5, P36.4, P36.8, P36.2, P36.1, P36.0, P36.3, P36.9<br>O08.0, O85.9, O75.3, O08.0 |

|                     |                                                                                                  |      |                                      |                                                                                                |                                                                      |                                                                                                                                                                                  |
|---------------------|--------------------------------------------------------------------------------------------------|------|--------------------------------------|------------------------------------------------------------------------------------------------|----------------------------------------------------------------------|----------------------------------------------------------------------------------------------------------------------------------------------------------------------------------|
| Lauridsen, 2015     | Chart review of patients with ICD codes of interest                                              | 78   | Manual Chart Review                  | One author reviewed all available medical charts                                               | Predefined diagnostic criteria for shock diagnosis and type of shock | R572, A41.9A<br>Diagnosis code + inotropic/vasopressor code: BFHC92, BFHC93, BFHC95 (excluding BFHC93E-BFHC93H)                                                                  |
| Søgaard, 2015       | Chart review of patients with ICD codes of interest                                              | 100  | Other - Blood Culture                | Skilled lab technician validated cases against results in laboratory information system        | Blood culture results                                                | Urosepsis: A41.9B<br>Combined Urosepsis + Septicemia/sepsis due to other Gram-negative organisms: A41.9B, A41.5<br>Septicemia/sepsis due to other Gram-negative organisms: A41.5 |
| Agyeman, 2019       | Blood culture-proven sepsis, determined by prospectively collecting clinical and laboratory data | 679  | Clinical and laboratory data         | Sepsis validated against prospectively collected clinical and laboratory data                  | 2005 consensus definitions                                           | N/A                                                                                                                                                                              |
| Parthasarathy, 2015 | Chart review of randomized patient cohort                                                        | 1323 | Registry Database-ACS NSQIP database | HES database entries were compared with ACS NSQIP entries using identical text string searches | Enrollment in ACS NSQIP                                              | Septic shock: T811 and R572                                                                                                                                                      |

|            |                                                     |     |                     |                                                                                                                                                                                                                                         |                                                  |                                                                                                                                                                                                                                                                                                                                                                                                                                                                                                                                                                                                                                                                                                                                                                                      |
|------------|-----------------------------------------------------|-----|---------------------|-----------------------------------------------------------------------------------------------------------------------------------------------------------------------------------------------------------------------------------------|--------------------------------------------------|--------------------------------------------------------------------------------------------------------------------------------------------------------------------------------------------------------------------------------------------------------------------------------------------------------------------------------------------------------------------------------------------------------------------------------------------------------------------------------------------------------------------------------------------------------------------------------------------------------------------------------------------------------------------------------------------------------------------------------------------------------------------------------------|
| Quan, 2013 | Chart review of patients with ICD codes of interest | 490 | Manual chart review | Two chart reviewers followed the AHRQ definitions to determine the presence or absence of PSIs from a patient's entire chart, and specified whether these events were present at the time of admission or arose during hospitalisation. | Definition of study variables not clearly stated | A400 Septicaemia due to streptococcus, group A<br>A401 Septicaemia due to streptococcus, group B<br>A402 Septicaemia due to streptococcus, group D<br>A403 Septicaemia due to Streptococcus pneumoniae<br>A408 Other streptococcal septicaemia<br>A409 Streptococcal septicaemia, unspecified<br>A410 Septicaemia due to Staphylococcus aureus<br>A411 Septicaemia due to other specified staphylococcus<br>A412 Septicaemia due to unspecified staphylococcus<br>A413 Septicaemia due to Haemophilus influenzae<br>A414 Septicaemia due to anaerobes<br>A415 Septicaemia due to other Gram-negative organisms<br>A418 Other specified septicaemia<br>A419 Septicaemia, unspecified<br>R578 Other shock<br>T811 Shock during or resulting from a procedure, not elsewhere classified |
|------------|-----------------------------------------------------|-----|---------------------|-----------------------------------------------------------------------------------------------------------------------------------------------------------------------------------------------------------------------------------------|--------------------------------------------------|--------------------------------------------------------------------------------------------------------------------------------------------------------------------------------------------------------------------------------------------------------------------------------------------------------------------------------------------------------------------------------------------------------------------------------------------------------------------------------------------------------------------------------------------------------------------------------------------------------------------------------------------------------------------------------------------------------------------------------------------------------------------------------------|

|              |                                                     |     |                     |                                                                                                                                                                                                                                        |                         |                                    |
|--------------|-----------------------------------------------------|-----|---------------------|----------------------------------------------------------------------------------------------------------------------------------------------------------------------------------------------------------------------------------------|-------------------------|------------------------------------|
| Reilly, 2020 | Chart review of patients with ICD codes of interest | 482 | Manual chart review | Eight anesthetists performed clinical chart review on Alfred Hospital perioperative registry to identify pre-determined COMPAC-StEP or American College of Surgeons National Surgical Quality Improvement Program major complications. | Anesthetists' diagnosis | A40.x, A41.x, A49.xx, K65.x, R65.x |
|--------------|-----------------------------------------------------|-----|---------------------|----------------------------------------------------------------------------------------------------------------------------------------------------------------------------------------------------------------------------------------|-------------------------|------------------------------------|

**Supplementary Table 4. Non-pooled unweighted PPV, NPV, Sn and Sp from 13 sepsis studies on the accuracy of sepsis ICD-10 codes**

|                                       | PPV          | NPV          | Sensitivity  | Specificity  |
|---------------------------------------|--------------|--------------|--------------|--------------|
| Mean                                  | 0.623        | 0.883        | 0.369        | 0.972        |
| Median                                | 0.720        | 0.959        | 0.419        | 0.995        |
| Standard Deviation                    | 0.266        | 0.144        | 0.233        | 0.042        |
| Interquartile range (q1, q3)          | 0.500, 0.847 | 0.855, 0.983 | 0.193, 0.575 | 0.962, 0.996 |
| Range (Min, Max)                      | 0.098, 1.000 | 0.547, 0.991 | 0.022, 0.719 | 0.854, 1.000 |
| Numer of studies (Number of patients) | 12 (10380)   | 6 (8059)     | 9 (11019)    | 6 (8059)     |

**Supplementary Table 5. GRADE: Certainty of evidence for the accuracy of sepsis ICD-10 codes**

|             |                             |
|-------------|-----------------------------|
| Sensitivity | 0.35 (95% CI: 0.22 to 0.48) |
| Specificity | 0.98 (95% CI: 0.98 to 0.99) |

|            |                 |     |                  |
|------------|-----------------|-----|------------------|
| Prevalence | 1% <sup>a</sup> | 10% | 25% <sup>b</sup> |
|------------|-----------------|-----|------------------|

- a. Estimate based on: Machado F, de Souza D. Epidemiology of Pediatric Septic Shock. Journal of Pediatric Intensive Care. 2018;08(01):003-010.
- b. Estimate based on; Sakr Y, Jaschinski U, Wittebole X, Szakmany T, Lipman J, Namendys-Silva S, Martin-Loeches I, Leone M, Lupu M, Vincent J. Sepsis in Intensive Care Unit Patients: Worldwide Data From the Intensive Care over Nations Audit. Open Forum Infectious Diseases. 2018;5(12).

| Outcome                                                                        | No of studies (No of patients) | Study design                                 | Factors that may decrease certainty of evidence |                          |                           |                          |                   | Effect per 100,000 patients tested |                             |                             | Test accuracy CoE |
|--------------------------------------------------------------------------------|--------------------------------|----------------------------------------------|-------------------------------------------------|--------------------------|---------------------------|--------------------------|-------------------|------------------------------------|-----------------------------|-----------------------------|-------------------|
|                                                                                |                                |                                              | Risk of bias                                    | Indirectness             | Inconsistency             | Imprecision              | Publication bias  | pre-test probability of 1%         | pre-test probability of 10% | pre-test probability of 25% |                   |
| <b>True positives</b><br>Patients with sepsis                                  | 5 studies<br>2568 patients     | Cross-sectional (cohort type accuracy study) | not serious <sup>a</sup>                        | not serious <sup>b</sup> | very serious <sup>c</sup> | not serious <sup>d</sup> | none <sup>e</sup> | 350<br>(220 to 480)                | 3500<br>(2200 to 4800)      | 8750<br>(5500 to 12000)     | ⊕⊕○○<br>Low       |
| <b>False negatives</b><br>Patients incorrectly classified as not having sepsis |                                |                                              |                                                 |                          |                           |                          |                   | 650<br>(520 to 780)                | 6500<br>(5200 to 7800)      | 16250<br>(13000 to 19500)   |                   |



|                                                                           |                            |                                              |                          |                          |                           |                          |      |                        |                        |                        |             |
|---------------------------------------------------------------------------|----------------------------|----------------------------------------------|--------------------------|--------------------------|---------------------------|--------------------------|------|------------------------|------------------------|------------------------|-------------|
| <b>True negatives</b><br>Patients without sepsis                          | 3 studies<br>1422 patients | Cross-sectional (cohort type accuracy study) | not serious <sup>a</sup> | not serious <sup>b</sup> | very serious <sup>c</sup> | not serious <sup>d</sup> | none | 97020 (97020 to 98010) | 88200 (88200 to 89100) | 73500 (73500 to 74250) | ⊕⊕○○<br>Low |
| <b>False positive</b><br>Patients incorrectly classified as having sepsis |                            |                                              |                          |                          |                           |                          |      | 1980 (990 to 1980)     | 1800 (900 to 1800)     | 1500 (750 to 1500)     |             |

a. Risk of Bias: Though the QUADAS, which evaluated all 13 studies, showed a moderate risk of bias due to lack of blinding, only one of the five studies included in sensitivity analysis and one of the three studies included in the specificity analysis failed to blind reviewers on ICD-10 codes. Most of the studies included in the sensitivity/specificity analysis outlined their standardized reviewing protocol. The risk of bias resulting from the one study was unlikely to lower the confidence in our estimate of the pooled effect and so we didn't downgrade.

b. Indirectness: The included five studies in the sensitivity analysis and three studies in the specificity analysis were limited to mostly adult in-patient populations, but the studies captured many ICD-10 versions/codes and directly compared ICD-10 codes to applicable comparators/reference standards, such as manual chart review. Thus, indirectness was not rated down.

c. Inconsistency: Inconsistency was rated down two levels due to the high clinical heterogeneity between studies (e.g. different codes, reference standard definitions, definitions of sepsis/severe sepsis/septic shock, study designs, settings, coder quality quality and thoroughness of studies) and consistently high I2 values (94-99%). Secondary analyses (e.g. comparing explicit vs. non-explicit coding, manual chart review vs. non-manual chart review study designs) could not fully explain the heterogeneity.

d. Imprecision: Even though the sensitivity forest plot confidence interval almost reaches the 0.50 threshold, the interpretation of the results at either end of the confidence interval have the same conclusion of low sensitivity.

e. The 'large effect' and 'dose response gradient' considerations did not apply to evaluating ICD-10. Though authors of included may report better-performing case definitions more so than poor-performing case definitions, publication bias was not detected.

**Supplementary Table 6. Comparison of sepsis ICD-10 code accuracy when manual chart is exclusively used versus when it is not exclusively used versus when it is used along registry database**

|                                | PPV                 |                         |                                         | NPV                 |                         |                                         | Sn                  |                         |                                         | Sp                  |                         |                                         |
|--------------------------------|---------------------|-------------------------|-----------------------------------------|---------------------|-------------------------|-----------------------------------------|---------------------|-------------------------|-----------------------------------------|---------------------|-------------------------|-----------------------------------------|
|                                | Manual chart review | Not manual chart review | Manual Chart Review + Registry Database | Manual chart review | Not manual chart review | Manual Chart Review + Registry Database | Manual chart review | Not manual chart review | Manual Chart Review + Registry Database | Manual chart review | Not manual chart review | Manual Chart Review + Registry Database |
| Mean                           | 0.643               | 0.735                   | 0.217                                   | 0.881               | 0.897                   | N/A                                     | 0.423               | 0.340                   | 0.052                                   | 0.967               | 0.998                   | N/A                                     |
| Median                         | 0.692               | 0.752                   | N/A                                     | 0.959               | 0.868                   | N/A                                     | 0.464               | 0.358                   | 0.052                                   | 0.987               | 0.998                   | N/A                                     |
| Standard Deviation             | 0.285               | 0.149                   | N/A                                     | 0.157               | 0.061                   | N/A                                     | 0.198               | 0.285                   | 0.011                                   | 0.044               | 0.002                   | N/A                                     |
| Interquartile range (q1, q3)   | 0.486,0.850         | 0.678,0.939             | N/A                                     | 0.816,0.985         | 0.862,0.917             | N/A                                     | 0.251,0.595         | 0.095,0.558             | 0.048,0.055                             | 0.956,0.996         | 0.997,0.999             | N/A                                     |
| Range (Min, Max)               | 0.098,1.000         | 0.500,0.939             | N/A                                     | 0.547,0.991         | 0.855,0.967             | N/A                                     | 0.067,0.719         | 0.022,0.670             | 0.044,0.059                             | 0.854,1.000         | 0.996,0.999             | N/A                                     |
| No of studies (No of patients) | 7078                | 4 (2896)                | 1 (406)                                 | 6668                | 2 (1391)                | N/A                                     | 6668                | 4 (3539)                | 1(812)                                  | 6668                | 2 (1391)                | N/A                                     |

**Supplementary Table 7. Comparison of sepsis ICD-10 code accuracy when codes are explicitly given versus not reported/explicit**

|                              | PPV                   |                           | NPV                   |                           | Sn                    |                           | Sp                    |                           |
|------------------------------|-----------------------|---------------------------|-----------------------|---------------------------|-----------------------|---------------------------|-----------------------|---------------------------|
|                              | Explicit ICD-10 codes | Non-Explicit ICD-10 codes |
| Mean                         | 0.647                 | 0.829                     | 0.880                 | 0.942                     | 0.341                 | 0.667                     | 0.972                 | 0.976                     |
| Median                       | 0.720                 | N/A                       | 0.959                 | N/A                       | 0.257                 | 0.667                     | 0.995                 | N/A                       |
| Standard Deviation           | 0.268                 | N/A                       | 0.147                 | N/A                       | 0.225                 | 0.005                     | 0.043                 | N/A                       |
| Interquartile range (q1, q3) | 0.500, 0.850          | N/A                       | 0.855, 0.991          | N/A                       | 0.165, 0.550          | 0.665,0.668               | 0.957, 0.996          | N/A                       |
| Range (Min, Max)             | 0.098, 1.000          | N/A                       | 0.547, 0.991          | N/A                       | 0.022, 0.719          | 0.663,0.670               | 0.854, 1.000          | N/A                       |
| Number of patients           | 9754                  | 626                       | 7433                  | 626                       | 9714                  | 1305                      | 7433                  | 626                       |

**Supplementary Table 8. Quartile classification of sepsis ICD-10 codes based on accuracy**

| Sepsis Studies | 1 <sup>st</sup> quartile, 3 <sup>rd</sup> quartile | Lowest (lower quartile, 25%) values                                                                                                                                                                                                                                                             | Middle (between 25%-75%) values                                                                                                                                                                                                                                                                                                                                                                                                                                                                                                                                                                                                                                                                                                | Highest (upper quartile, 75%) values                                                                                                                                                                                                                                                                                                                                |
|----------------|----------------------------------------------------|-------------------------------------------------------------------------------------------------------------------------------------------------------------------------------------------------------------------------------------------------------------------------------------------------|--------------------------------------------------------------------------------------------------------------------------------------------------------------------------------------------------------------------------------------------------------------------------------------------------------------------------------------------------------------------------------------------------------------------------------------------------------------------------------------------------------------------------------------------------------------------------------------------------------------------------------------------------------------------------------------------------------------------------------|---------------------------------------------------------------------------------------------------------------------------------------------------------------------------------------------------------------------------------------------------------------------------------------------------------------------------------------------------------------------|
| PPV            | 0.5, 0.847                                         | <ul style="list-style-type: none"> <li>· Fleischmann-Struzek, 2018 (Severe sepsis -implicit coding)</li> <li>· Madsen, 1998 (Septicemia)</li> <li>· Quan, 2013 (Postoperative sepsis among surgery patients or non-surgery patients)</li> <li>· Reilly, 2020 (septic shock and SIRS)</li> </ul> | <ul style="list-style-type: none"> <li>· Ibrahim, 2012 (D-BC-EDIS)</li> <li>· Fleischmann-Struzek, 2018 (Sepsis and severe sepsis - R Codes, explicit coding)</li> <li>· Jolley, 2015 (Optimized non-ICU abstraction for sepsis)</li> <li>· Holland-Bill, 2014 (Confirmed by PGA, Confirmed by evidence-based criteria)</li> <li>· Das, 2016 (ICD-10 (A41.0) code, A41.0A41.0 coded episodes including the SAB episodes identified at other institutions (LIS-/ICD10+/SAB+))</li> <li>· Dunatchik, 2017 (Sepsis)</li> <li>· Lauridsen, 2015 (Sepsis, Diagnosis code + inotropic/vasopressor code)</li> <li>· Sogaard, 2015 (Urosepsis, Combined Urosepsis + Septicemia/sepsis due to other Gram-negative organisms)</li> </ul> | <ul style="list-style-type: none"> <li>· Ibrahim, 2012 (D-BC-HMDS)</li> <li>· Jolley, 2015 (Optimized coding algorithm - Severe Sepsis, Optimized coding algorithm – Sepsis, CIHI - Severe Sepsis, CIHI – Sepsis, CIHI Non-ICU – Sepsis, CIHI Non-ICU - Severe Sepsis)</li> <li>· Sogaard, 2015 (Septicemia/sepsis due to other Gram-negative organisms)</li> </ul> |

|     |              |                                                                                                                                                                                                                                                  |                                                                                                                                                                                                                                                                                                                                                                                                                               |                                                                                                                                                                                                                                                                                                                                                  |
|-----|--------------|--------------------------------------------------------------------------------------------------------------------------------------------------------------------------------------------------------------------------------------------------|-------------------------------------------------------------------------------------------------------------------------------------------------------------------------------------------------------------------------------------------------------------------------------------------------------------------------------------------------------------------------------------------------------------------------------|--------------------------------------------------------------------------------------------------------------------------------------------------------------------------------------------------------------------------------------------------------------------------------------------------------------------------------------------------|
| NPV | 0.855, 0.983 | <ul style="list-style-type: none"> <li>· Jolley, 2015 (CIHI- Severe Sepsis, Optimized coding algorithm – Sepsis, Optimized coding algorithm - Severe Sepsis, CIHI – Sepsis)</li> </ul>                                                           | <ul style="list-style-type: none"> <li>· Ibrahim, 2012 (D-BC-EDIS)</li> <li>· Fleischmann-Struzek, 2018 (Sepsis AND severe sepsis - R Codes, sepsis and severe sepsis - explicit coding)</li> <li>· Jolley, 2015 (CIHI Non-ICU – Sepsis, Optimized Non-ICU – Sepsis)</li> <li>· Dunatchik, 2017 (Sepsis)</li> <li>· Parthasarathy, 2015 (Septic shock)</li> </ul>                                                             | <ul style="list-style-type: none"> <li>· Fleischmann-Struzek, 2018 (Severe sepsis -R Codes, sepsis - explicit coding, severe sepsis - implicit coding)</li> <li>· Jolley, 2015 (CIHI Non-ICU - Severe Sepsis, Optimized Non-ICU - Severe Sepsis)</li> </ul>                                                                                      |
| Sn  | 0.193, 0.575 | <ul style="list-style-type: none"> <li>· Ibrahim, 2012 (D-BC EDIS, D-BC HMDS)</li> <li>· Jolley, 2015 (CIHI Non-ICU - Sepsis)</li> <li>· Madsen, 1998 (Septicemia + Sepsis, Septicemia)</li> <li>· Parthasarathy, 2015 (Septic shock)</li> </ul> | <ul style="list-style-type: none"> <li>· Fleischmann-Struzek, 2018 (Sepsis and severe sepsis - R codes and explicit coding, severe sepsis - R Codes and explicit coding)</li> <li>· Jolley, 2015 (CIHI - Severe Sepsis, CIHI – Sepsis, CIHI Non-ICU - Severe Sepsis, Optimized Non-ICU - Severe Sepsis)</li> <li>· Das, 2016 (ICD-10 (A41.0) code, ICD-10 (A41.0) Excluding the Emergency Department presentation)</li> </ul> | <ul style="list-style-type: none"> <li>· Agyeman, 2019 (Blood culture proven sepsis)</li> <li>· Fleischmann-Struzek, 2018 (Severe sepsis -implicit coding)</li> <li>· Jolley, 2015 (Optimized coding algorithm – Sepsis, Optimized coding algorithm - Severe Sepsis, Optimized Non-ICU – Sepsis))</li> <li>· Dunatchik, 2017 (Sepsis)</li> </ul> |

|    |              |                                                                                                                                                                                                                                                      |                                                                                                                                                                                                                                                     |                                                                                                                                                                                                           |
|----|--------------|------------------------------------------------------------------------------------------------------------------------------------------------------------------------------------------------------------------------------------------------------|-----------------------------------------------------------------------------------------------------------------------------------------------------------------------------------------------------------------------------------------------------|-----------------------------------------------------------------------------------------------------------------------------------------------------------------------------------------------------------|
| Sp | 0.962, 0.996 | <ul style="list-style-type: none"> <li>· Fleischmann-Struzek, 2018 (Severe sepsis -implicit coding)</li> <li>· Jolley, 2015 (Optimized coding algorithm - Sepsis, Optimized coding algorithm - Severe Sepsis, Optimized Non-ICU – Sepsis)</li> </ul> | <ul style="list-style-type: none"> <li>· Fleischmann-Struzek, 2018 (Severe sepsis -explicit coding)</li> <li>· Jolley, 2015 (CIHI - Severe Sepsis, CIHI – Sepsis, Optimized Non-ICU - Severe Sepsis)</li> <li>· Dunatchik, 2017 (Sepsis)</li> </ul> | <ul style="list-style-type: none"> <li>· Ibrahim, 2012 (D-BC-HMDS)</li> <li>· Jolley, 2015 (CIHI Non-ICU – Sepsis, CIHI Non-ICU - Severe Sepsis)</li> <li>· Parthasarathy, 2015 (Septic shock)</li> </ul> |
|----|--------------|------------------------------------------------------------------------------------------------------------------------------------------------------------------------------------------------------------------------------------------------------|-----------------------------------------------------------------------------------------------------------------------------------------------------------------------------------------------------------------------------------------------------|-----------------------------------------------------------------------------------------------------------------------------------------------------------------------------------------------------------|

## Supplementary Appendix 1. MESH Terms and Search Strategies

To identify studies assessing diagnostic accuracy of ICD codes for sepsis outcomes, the boolean operator 'AND' was used to combine three search concepts: coding, validity, sepsis outcome.

- Articles concerning sepsis outcomes were sought using Boolean operator 'OR' to combine Medical Subject Headings (MeSH) terms (e.g. 'sepsis'), relevant Emtree terms (e.g. 'septic shock') and variations of the keyword searches (e.g. septicemia, bacteremia, disseminated candidiasis, and fungemia).
- Articles concerning ICD-10 coding were sought with Boolean operator 'OR' to combine MeSH and keyword searches: 'international classification of diseases', 'disease classification', 'icd 10', 'clinical coding'
  - To expand the coding concept, Boolean operator 'OR' combined the MeSH terms and keyword searches for following terms as well:
    - 'medical records', 'hospital records', 'electronic health records', 'data base', 'algorithms', 'patient discharge', 'hospital mortality', 'hospitalization', 'validation studies', 'review', 'systematic review', 'claims', 'diagnosis', 'identify', 'registry'
- Articles concerning validity were sought using Boolean operator 'OR' to combine the MeSH and keyword searches for the following terms:
  - 'Predictive value', 'risk assessment', 'reproducibility', 'retrospective studies', 'validation', 'validity', 'positive predictive value', 'negative predictive', 'incidence', 'prevalence', 'accuracy', 'administrative data', 'surveillance', 'specificity', 'sensitivity'

### EMBASE/Ovid:

1. "international classification of diseases"/ or disease /cl or icd-10/ or clinical coding/
  2. (icd-10\* or "icd 10").m\_titl
  
  3. medical records/ or hospital records/ or electronic health records/ or data base/ or algorithms/ or patient discharge/ or hospital mortality/ or hospitalization/ or validation studies as topic/ or review/ or systematic review/ or claim\*.m\_titl. or diagnos\*.m\_titl. or identif\*.m\_titl. or registr\*.m\_titl.
  4. predictive value/ or risk assessment/ or reproducibility/ or retrospective studies/
  5. (validat\* or "positive predictive value" or "negative predictive value" or incidence or prevalence or accuracy or "administrative data\*" or surveillance or specificity or sensitivity).m\_titl
  
  6. sepsis/ or septic shock/
  7. (septicemi\* or bacteremi\* or "disseminated candidiasis" or fungemi\* or sepsis).m\_titl
  8. Infections/cl, di, ep
  
  9. 1 or 2
  10. 3 or 4 or 5
  11. 6 or 7 or 8
  12. 9 and 10 and 11
- Results: 699*

### Web of Science (all databases including MedLine):

1. TS = ("icd-10\*" or "icd 10\*" or "international classification of diseases\*" or "clinical coding" or "disease classification")

2. TI = ("medical records" or "hospital records" or "electronic health records" or database or algorithms or "patient discharge" or "hospital mortality" or "hospitalization" or "validation study" or review or "systematic review" or claim\* or diagnos\* or identif\* or registr\*)

3. TI = ("predictive value" or "risk assessment" or "reproducibility" or "retrospective studies")

4. TI = (validat\* or "positive predictive value" or "negative predictive value" or incidence or prevalence or accuracy or "administrative data\*" or surveillance or sensitivity or specificity)

5. TI = ("sepsis" or septic?emi\* or bact?eremi\* or "disseminated candidiasis" or fung?emi\* or "transfusion reaction" or "septic shock")

6. 2 or 3 or 4

7. 1 and 6 and 5

*If only 1 TS: 90*

### **Cochrane (CENTRAL and systematic reviews)**

"icd-10\*" OR "icd 10\*" OR "international classification of diseases\*" OR "clinical coding" OR "disease classification" in Title Abstract Keyword

AND "sepsis" OR septic?emi\* OR bact?eremi\* OR "disseminated candidiasis" OR fung?emi\* OR "transfusion reaction" OR "septic shock" in Title Abstract Keyword

*Results: 0 reviews, 0 protocols, 46 trials*

### **McMaster SuperFilters**

("icd-10\*" OR "icd 10\*" OR "international classification of diseases\*" OR "clinical coding" OR "disease classification")

AND

("sepsis" OR septic?emi\* OR bact?eremi\* OR "disseminated candidiasis" OR fung?emi\* OR "transfusion reaction" OR "septic shock")

Methodologic Filters: Diagnosis; Methodologic Scope: Narrow (specific)

Date Filter: To: 2021/09/05

*Results: 0 McMaster Plus, 35 PubMed*

### **Epistemonikos**

(title:( "icd-10\*" OR "icd 10\*" OR "international classification of diseases\*" OR "clinical coding" OR "disease classification") OR abstract:( "icd-10\*" OR "icd 10\*" OR "international classification of diseases\*" OR "clinical coding" OR "disease classification"))

AND

(title:( "sepsis" OR septic?emi\* OR bact?eremi\* OR "disseminated candidiasis" OR fung?emi\* OR "transfusion reaction" OR "septic shock") OR abstract:( "sepsis" OR septic?emi\* OR bact?eremi\* OR "disseminated candidiasis" OR fung?emi\* OR "transfusion reaction" OR "septic shock"))

*Results: 8*



## Supplementary Appendix 2. Additional sensitivity and specificity forest plots

Five studies, with a total of 16 subgroups, were eligible for the meta-analysis.

We included all 16 subgroups in our meta-analysis because the included studies did not provide a “primary result” and because subgroups were heterogenous/non-redundant in abstraction method (e.g. implicit coding, explicit coding, algorithmic sets of ICD-10 codes), administrative database sources (e.g. emergency department information, hospital mortality data system), and type of sepsis (e.g. sepsis, septicemia).

We performed two additional meta-analysis methods to minimize intercorrelation between values of the same patient cohort/studies.

### Method 1: Optimized approach of subgroup selection for meta-analysis

In this method, we selected one subgroup from each of the five studies for inclusion in the meta-analysis.

In order to select the “optimized” subgroup, we followed a hierarchy of priority:

- explicit codes are prioritized over implicit codes (which combine infection and organ dysfunction codes)
- hospital information systems are prioritized over mortality data systems
- bigger cohorts are prioritized over smaller cohorts
- sepsis is prioritized over severe sepsis, septicemia, or septic shock

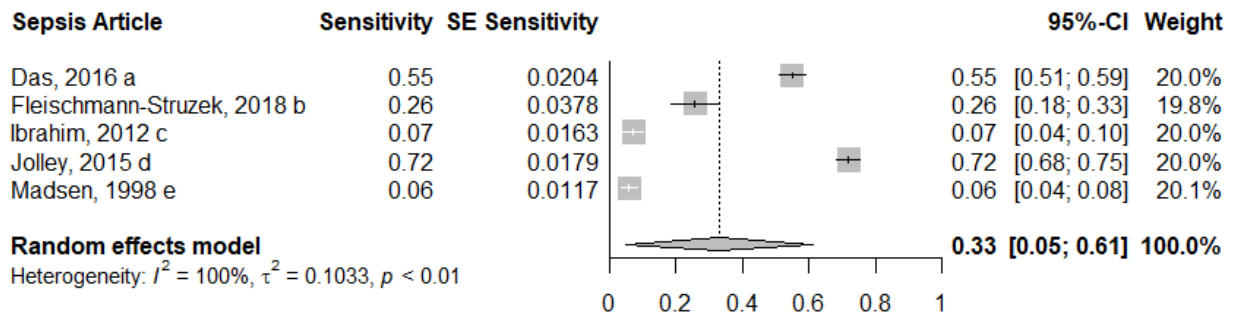

a = A41.0, b = explicit abstraction of sepsis, c = Optimized coding algorithm ICU – Sepsis; d = Diagnosis-based code categories in emergency department information system, e= sepsis and septicemia

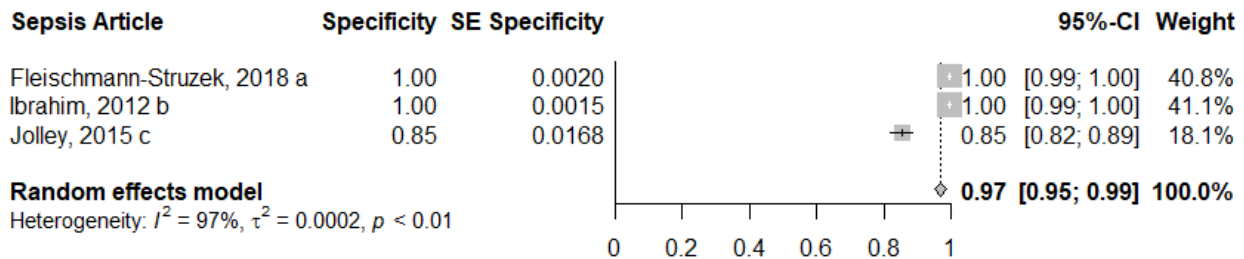

a = explicit abstraction of sepsis, b = Optimized coding algorithm ICU – Sepsis; c = Diagnosis-based code categories in emergency department information system

**Method 2: Pooled multi-step approach to meta-analysis**

In this method, we first created a forest plot random effects model for each study using their provided subgroups. Next, we combined each study’s forest plot to generate a composite sensitivity and specificity value.

Below is the composite sensitivity and specificity forest plot. Following that are the individual study’s random effects forest plots based on their corresponding subgroups.

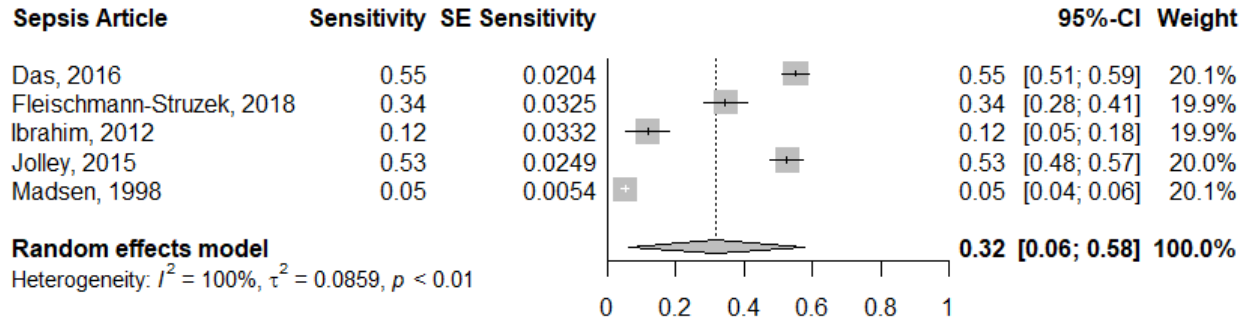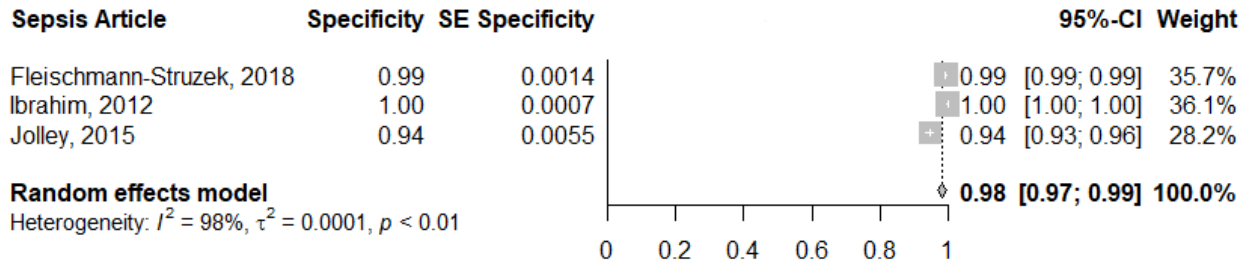

### Individual Study - Sensitivity Plots

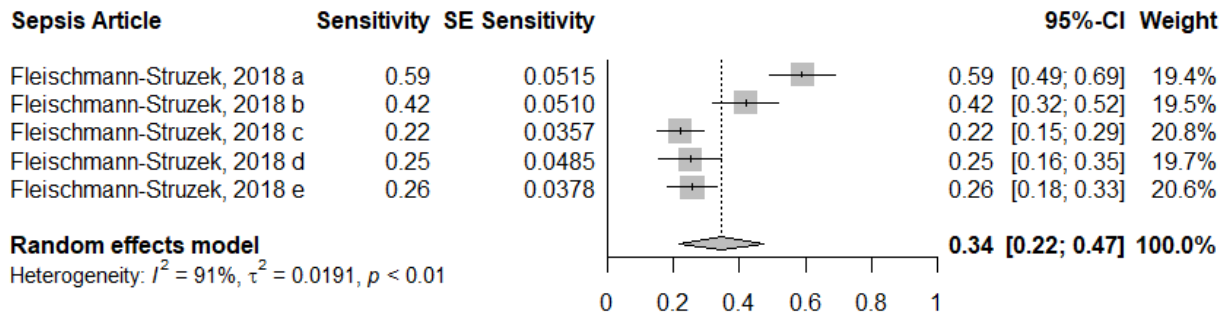

a = Implicit abstraction for severe sepsis, b = Explicit abstraction with organ dysfunction codes for severe sepsis, c = R code (R65.0, R65.1, R57.2) abstraction for sepsis, d = R code (R65.1, R57.2) abstraction for severe sepsis, e = Explicit abstraction for sepsis

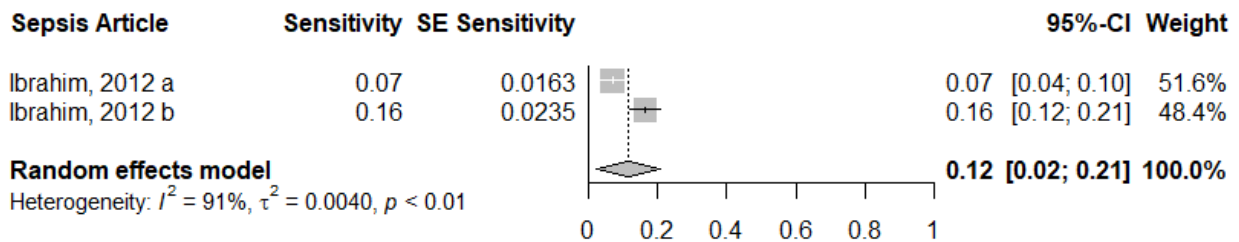

a = Diagnosis-based code categories in emergency department information system, b = Diagnosis-based code categories in hospital mortality data system

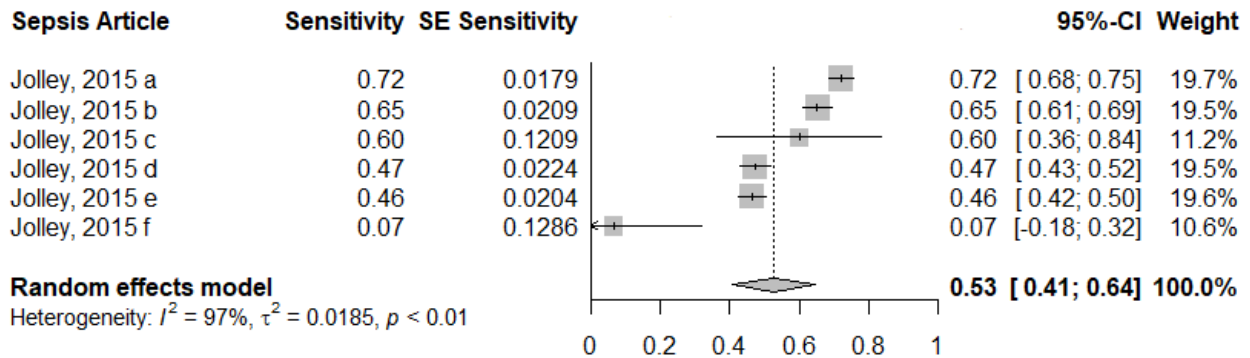

a = Optimized coding algorithm for ICU sepsis, b = Optimized coding algorithm for ICU severe sepsis, c = Optimized coding algorithm for non-ICU sepsis, d = CIHI coding algorithm for ICU severe sepsis, e = CIHI coding algorithm for ICU sepsis, f = CIHI coding algorithm for non-ICU Sepsis

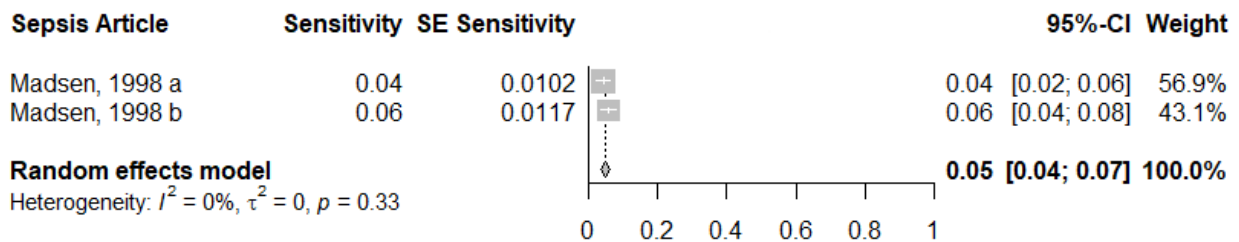

a = Septicemia, b = Sepsis and Septicemia

### Individual Study - Specificity Plots

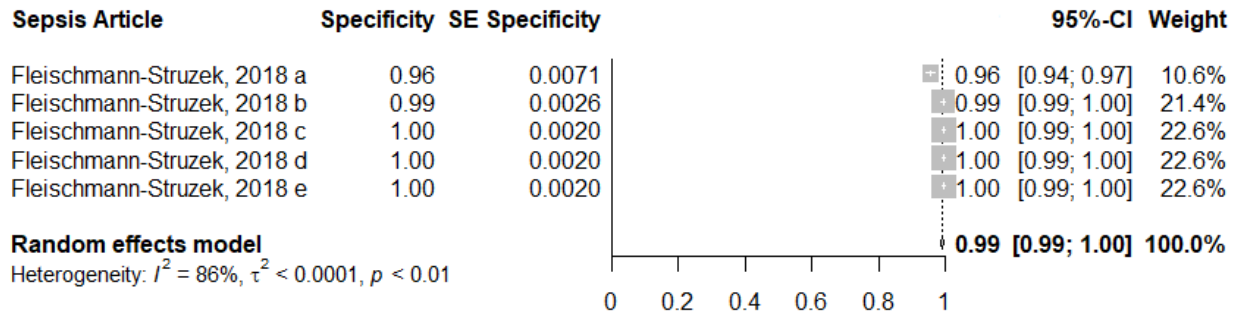

a = Implicit abstraction for severe sepsis, b = Explicit abstraction with organ dysfunction codes for severe sepsis, c = R code (R65.0, R65.1, R57.2) abstraction for sepsis, d = R code (R65.1, R57.2) abstraction for severe sepsis, e = Explicit abstraction for sepsis

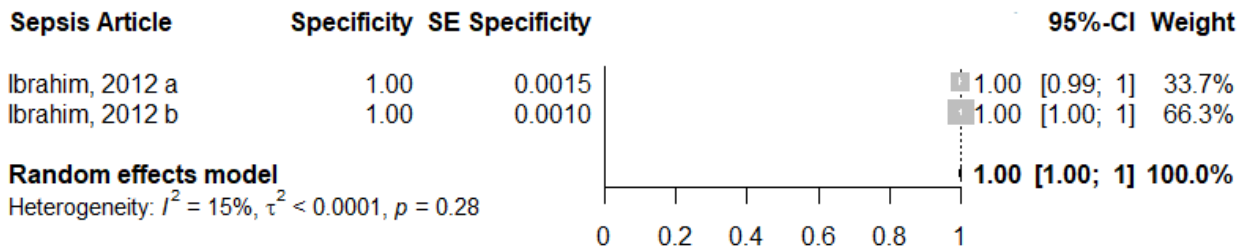

a = Diagnosis-based code categories in emergency department information system, b = Diagnosis-based code categories in hospital mortality data system

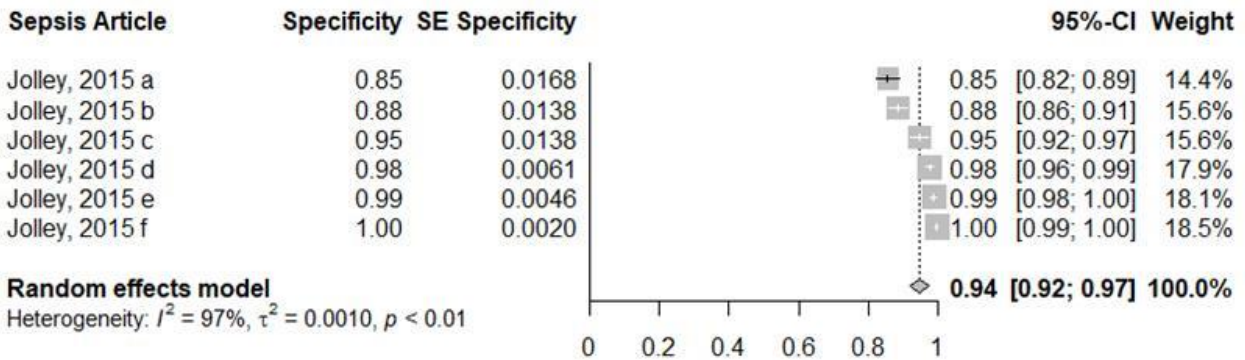

a = Optimized coding algorithm for ICU sepsis, b = Optimized coding algorithm for ICU severe sepsis, c = Optimized coding algorithm for non-ICU sepsis, d = CIHI coding algorithm for ICU severe sepsis, e = CIHI coding algorithm for ICU sepsis, f = CIHI coding algorithm for non-ICU Sepsis

# Supplementary Figure 1. QUADAS of 15 sepsis studies on the accuracy of ICD-10 codes

|                           | Representative sample | Clear Selection Criteria | Accurate reference standard | Conditional unlikely to have changed | Whole sample received reference standard | Application of RS not based on index | Whole sample received reference standard | Index test well described | Reference standard well explained | Index test blinded to reference standard result | Reference standard blinded to index test result | Clinical data available is realistic | Indeterminate results reported | Withdrawals from study explained |
|---------------------------|-----------------------|--------------------------|-----------------------------|--------------------------------------|------------------------------------------|--------------------------------------|------------------------------------------|---------------------------|-----------------------------------|-------------------------------------------------|-------------------------------------------------|--------------------------------------|--------------------------------|----------------------------------|
| Agyeman, 2019             | +                     | +                        | +                           | +                                    | +                                        | +                                    | +                                        | +                         | +                                 | +                                               | ?                                               | +                                    | +                              | ?                                |
| Ibrahim, 2012             | +                     | +                        | +                           | +                                    | +                                        | +                                    | +                                        | +                         | +                                 | +                                               | +                                               | +                                    | +                              | +                                |
| Fleischmann-Struzek, 2018 | +                     | +                        | +                           | +                                    | +                                        | +                                    | +                                        | +                         | +                                 | +                                               | +                                               | +                                    | +                              | +                                |
| Jolley, 2015              | +                     | +                        | +                           | +                                    | +                                        | +                                    | +                                        | +                         | +                                 | +                                               | +                                               | +                                    | +                              | +                                |
| Holland-Bill, 2013        | +                     | +                        | +                           | +                                    | +                                        | +                                    | +                                        | +                         | +                                 | +                                               | +                                               | +                                    | +                              | +                                |
| Holland-Bill, 2014        | +                     | +                        | +                           | +                                    | +                                        | +                                    | +                                        | +                         | +                                 | +                                               | +                                               | +                                    | +                              | +                                |
| Fleischmann, 2016         | +                     | +                        | +                           | +                                    | +                                        | +                                    | +                                        | +                         | +                                 | +                                               | +                                               | +                                    | +                              | +                                |
| Das, 2016                 | +                     | +                        | +                           | +                                    | +                                        | +                                    | +                                        | +                         | +                                 | +                                               | +                                               | +                                    | +                              | +                                |
| Dunatchik, 2017           | +                     | +                        | +                           | +                                    | +                                        | +                                    | +                                        | +                         | +                                 | +                                               | +                                               | +                                    | +                              | +                                |
| Madsen, 1998              | +                     | +                        | +                           | +                                    | +                                        | +                                    | +                                        | +                         | +                                 | +                                               | +                                               | +                                    | +                              | +                                |
| Lauridsen, 2015           | +                     | +                        | +                           | +                                    | +                                        | +                                    | +                                        | +                         | +                                 | +                                               | +                                               | +                                    | +                              | +                                |
| Søgaard, 2015             | +                     | +                        | +                           | +                                    | +                                        | +                                    | +                                        | +                         | +                                 | +                                               | +                                               | +                                    | +                              | +                                |
| Parthasarathy, 2015       | +                     | +                        | +                           | +                                    | +                                        | +                                    | +                                        | +                         | +                                 | +                                               | +                                               | +                                    | +                              | +                                |
| Quan, 2013                | +                     | +                        | +                           | +                                    | +                                        | +                                    | +                                        | +                         | +                                 | +                                               | +                                               | +                                    | +                              | +                                |
| Reilly, 2020              | +                     | +                        | +                           | +                                    | +                                        | +                                    | +                                        | +                         | +                                 | +                                               | +                                               | +                                    | +                              | +                                |

Risk of bias summary showing the authors' evaluation of each included study's risk of bias based on categories defined by the Quality Assessment of Diagnostic Accuracy Studies tool
